# Supplementary material for: Experimental and theoretical insights into the support-dependent N2 selectivity of CuO-based NH3-SCO catalysts
Source: Royal Society of Chemistry journal article supplement (doi:10.1039/d5ta02752g), 2025-01-01
Supplement: d5ta02752g1.pdf [file d5ta02752g1.pdf]

## Supplementary information

### Experimental and Theoretical Insight into the Support-Dependent N<sub>2</sub> Selectivity of CuO-based NH<sub>3</sub>-SCO Catalysts

Mingchu Ran<sup>a</sup>, Yi Dong<sup>a,b</sup>, Xiao Zhang<sup>a,b,c,\*</sup>, Saisai Lin<sup>a</sup>, Peng Liu<sup>a,c</sup>, Yang Yang<sup>a</sup>, Hao Song<sup>a</sup>, Xuesen Du<sup>d</sup>, Chenghang Zheng<sup>a,b,c</sup>, Xiang Gao<sup>a,b,c,\*</sup>

<sup>a</sup>State Key Laboratory of Clean Energy Utilization, Zhejiang University, Hangzhou 310027, China

<sup>b</sup>Zhejiang Baima Lake Laboratory Co., Ltd., Hangzhou 310051, China

<sup>c</sup>Jiaxing Research Institute, Zhejiang University, Jiaxing 314000, China

<sup>d</sup>Key Laboratory of Low-Grade Energy Utilization Technologies and Systems of Ministry of Education of China, Chongqing University, Chongqing 400044, China

\*To whom correspondence may be addressed. Email: [xgao1@zju.edu.cn](mailto:xgao1@zju.edu.cn) (X. Gao); [zhangx\\_energy@zju.edu.cn](mailto:zhangx_energy@zju.edu.cn) (X. Zhang).

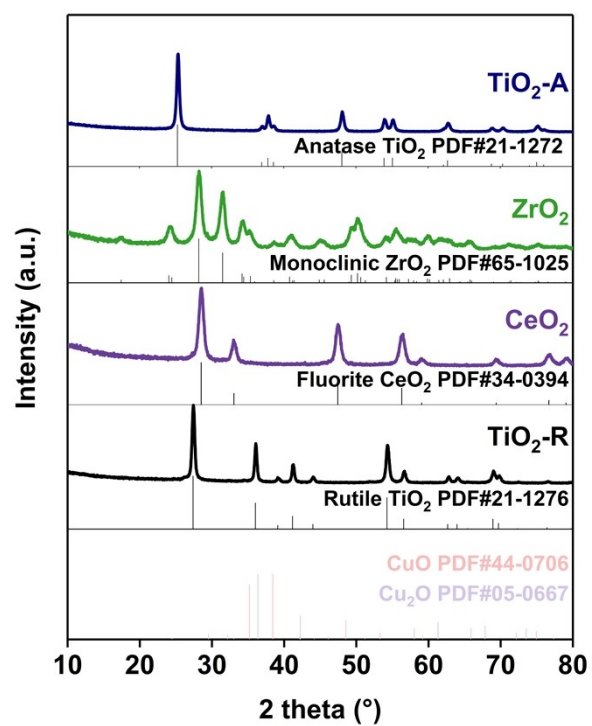

**Figure S1.** XRD patterns of the supports.

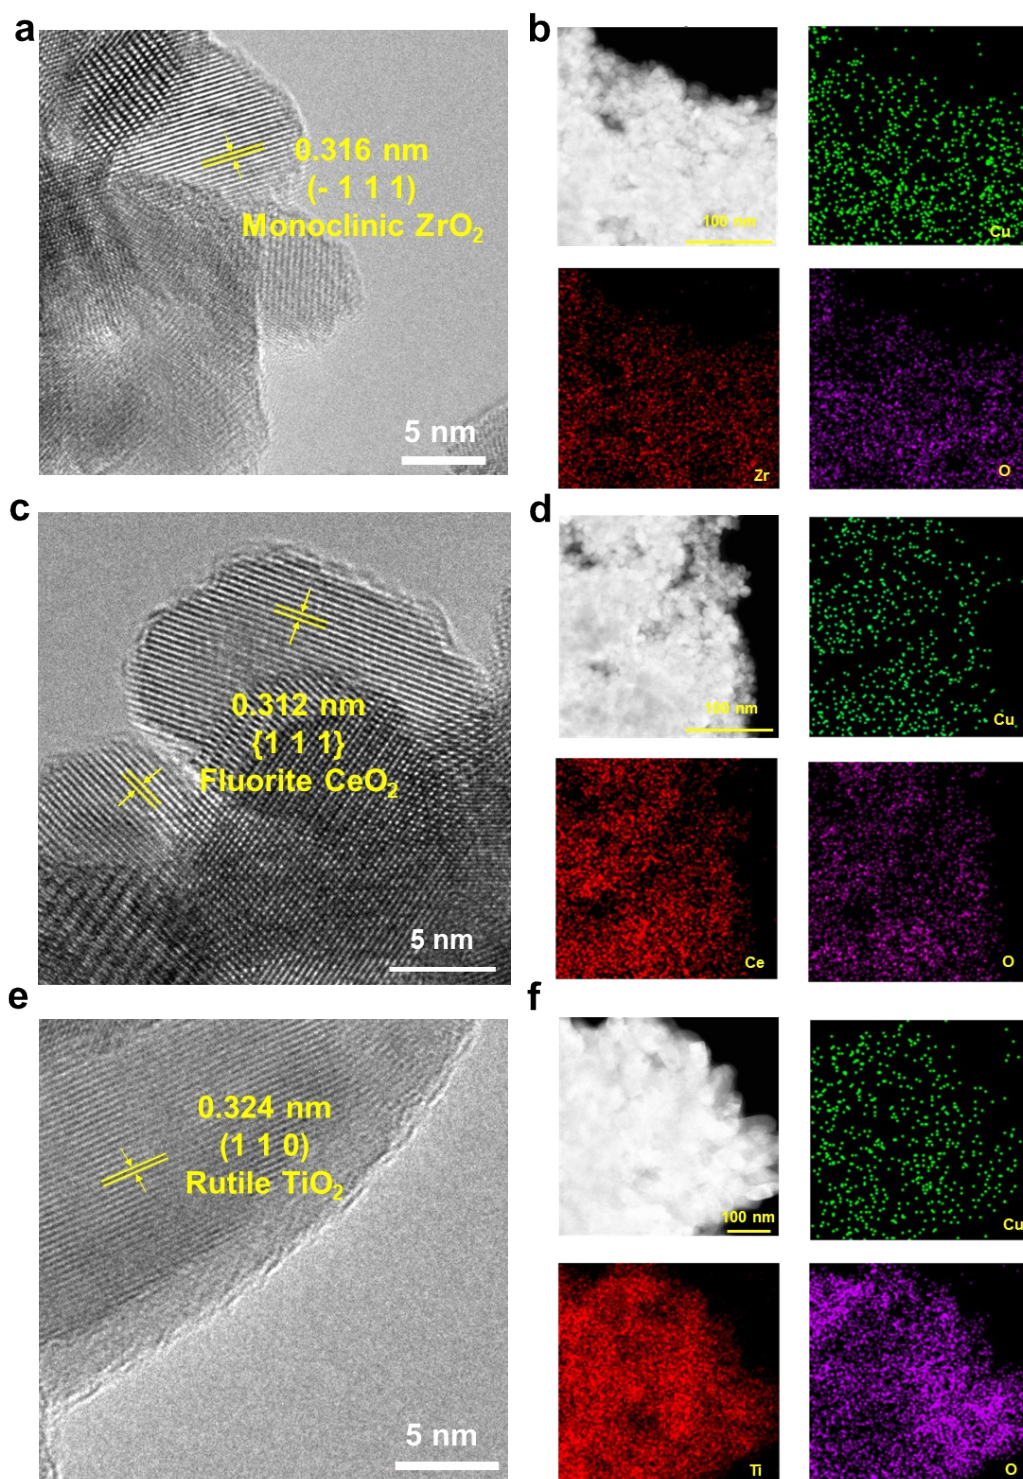

**Figure S2.** (a, c, e) HRTEM image of CuO/ZrO<sub>2</sub>, CuO/CeO<sub>2</sub> and CuO/TiO<sub>2</sub>-R. (b, d, f) EDS mapping of CuO/ZrO<sub>2</sub>, CuO/CeO<sub>2</sub> and CuO/TiO<sub>2</sub>-R.

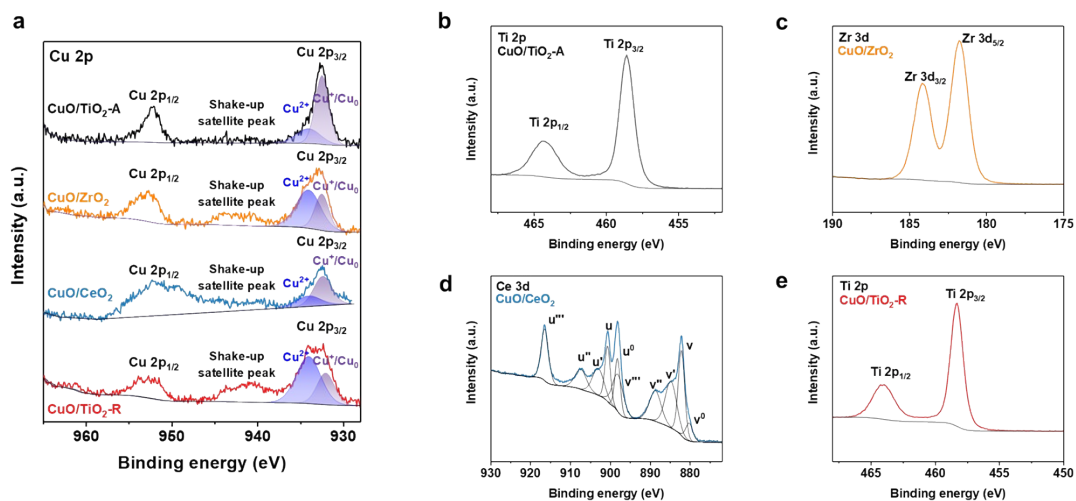

**Figure S3.** XPS results. (a) Cu 2p spectrum. (b) Ti 2p spectrum of CuO/TiO<sub>2</sub>-A. (c) Zr 3d spectrum of CuO/ZrO<sub>2</sub>. (d) Ce 3d spectrum of CuO/CeO<sub>2</sub>. (e) Ti 2p spectrum of CuO/TiO<sub>2</sub>-R.

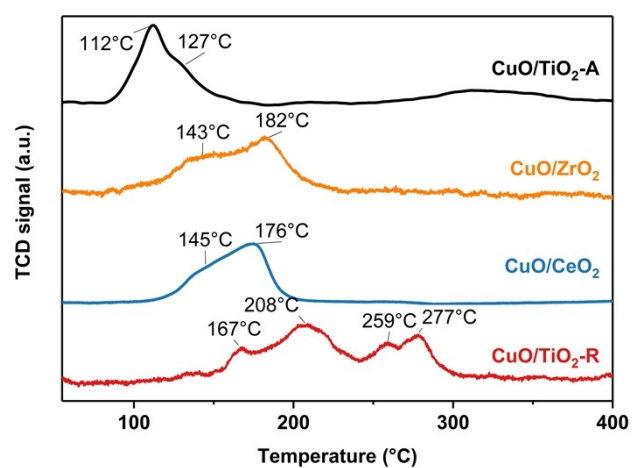

**Figure S4.** H<sub>2</sub>-TPR results of the catalysts.

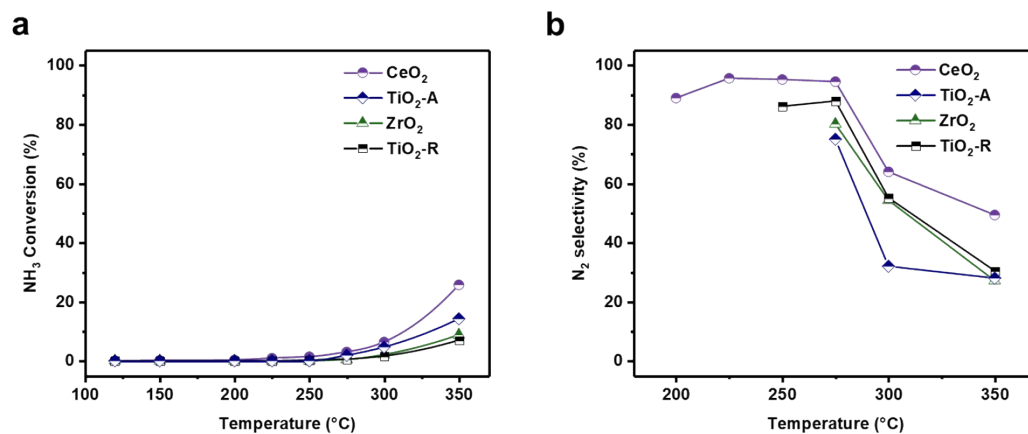

**Figure S5.** Catalytic performance evaluation of the metal oxide supports. (a) NH<sub>3</sub> conversion. (b) N<sub>2</sub> selectivity. Reaction conditions: 500 ppm NH<sub>3</sub>, 5 vol% O<sub>2</sub>, Ar as balance gas, total flow rate = 200 sccm, GHSV = 60000 cm<sup>3</sup> g<sub>cat</sub><sup>-1</sup> h<sup>-1</sup>.

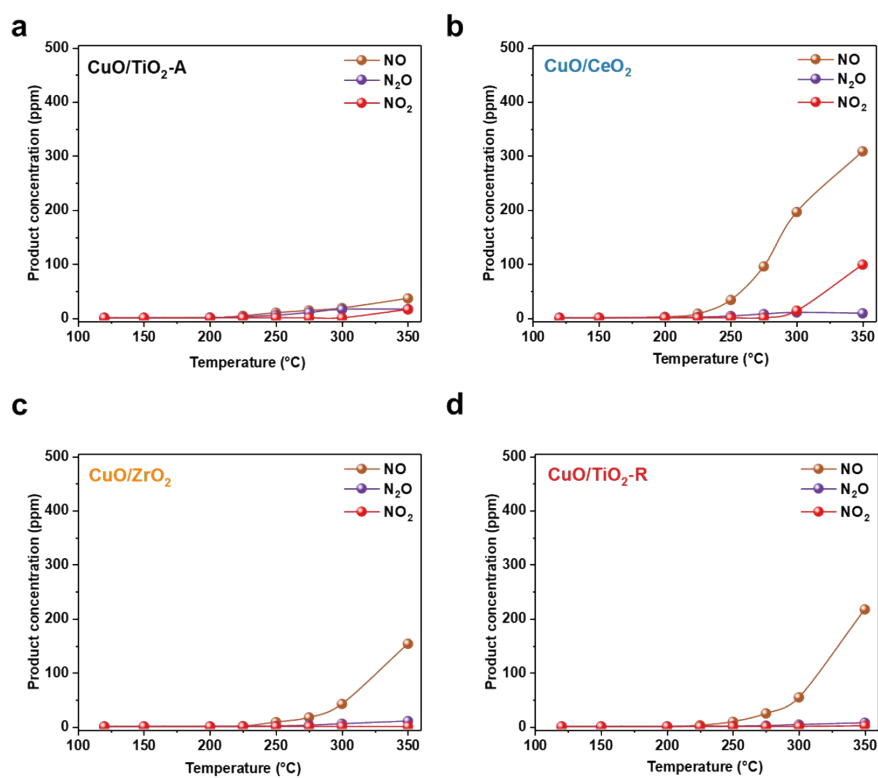

**Figure S6.** Byproduct analysis of different catalysts.

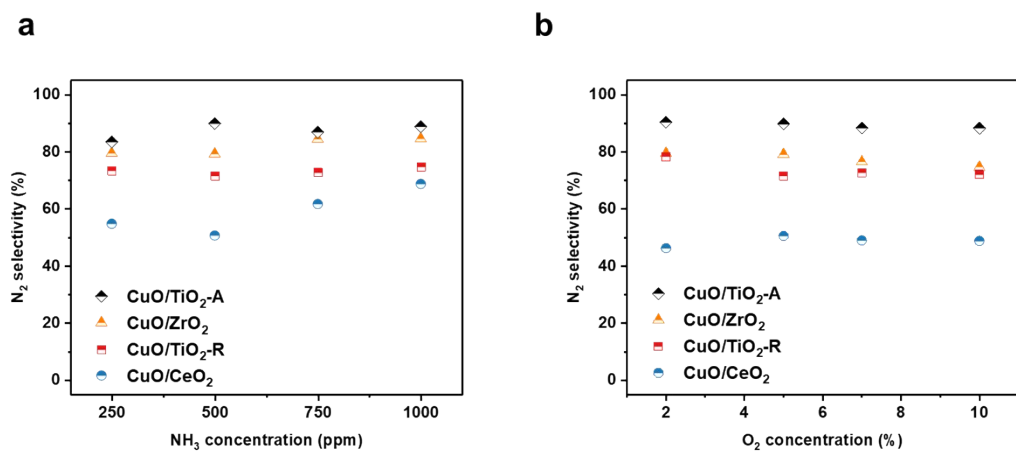

**Figure S7** Influence of reactant concentration on the  $N_2$  selectivity at 250°C.



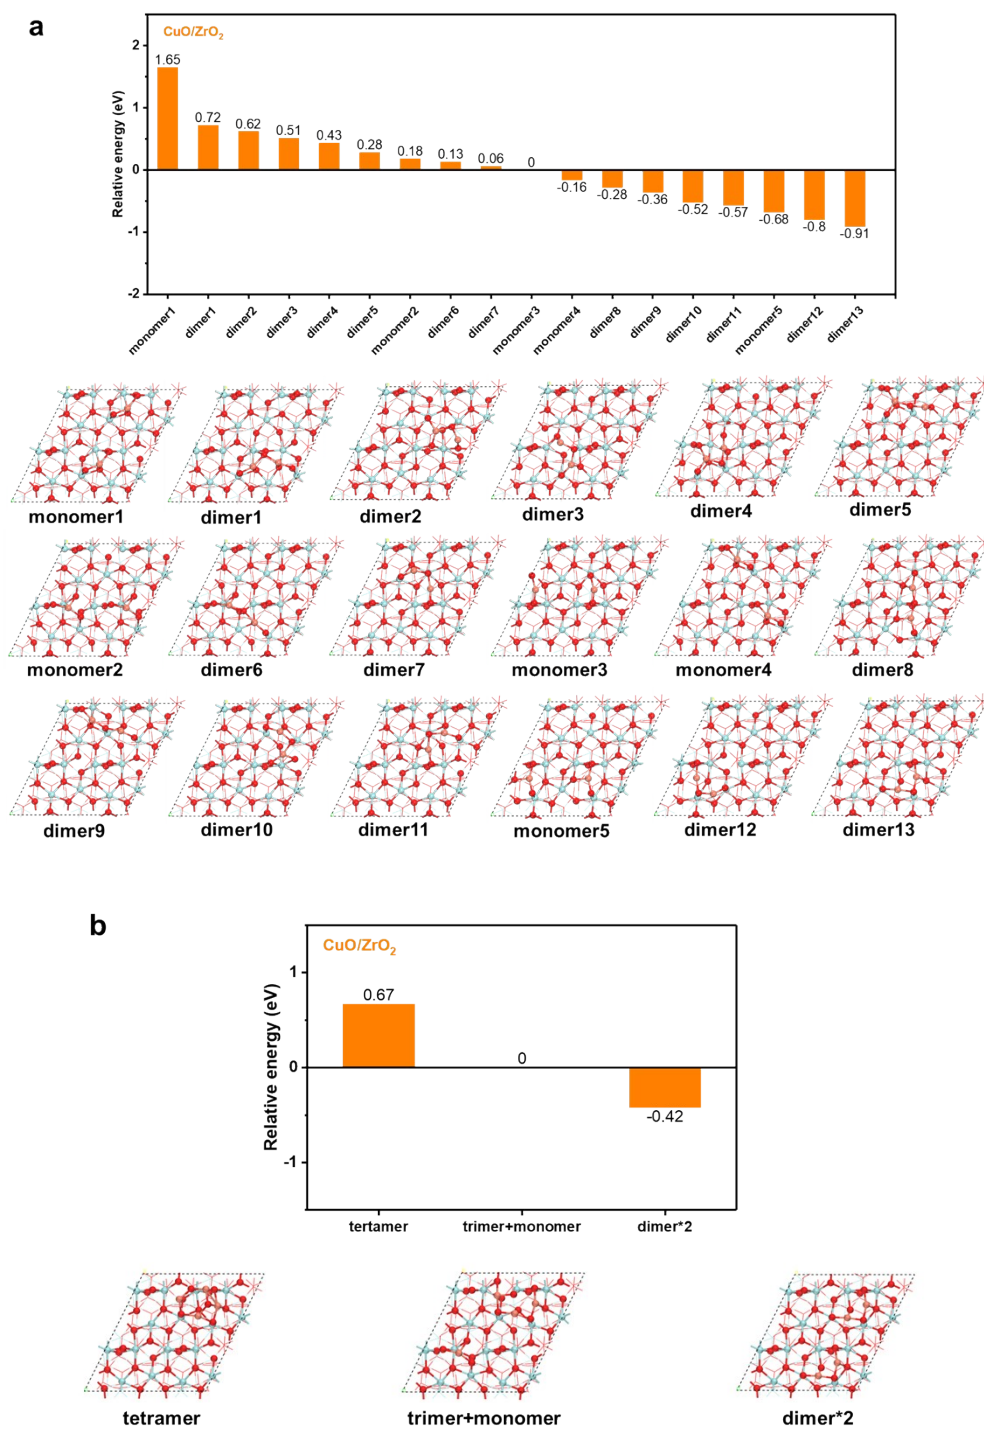

**Figure S8.** Energy comparison of different configurations of CuO/ZrO<sub>2</sub> at different surface Cu density. (a) 2 CuO in each periodic cell. (b) 4 CuO in each periodic cell. Red, orange and green balls represent O, Cu, and Zr respectively.

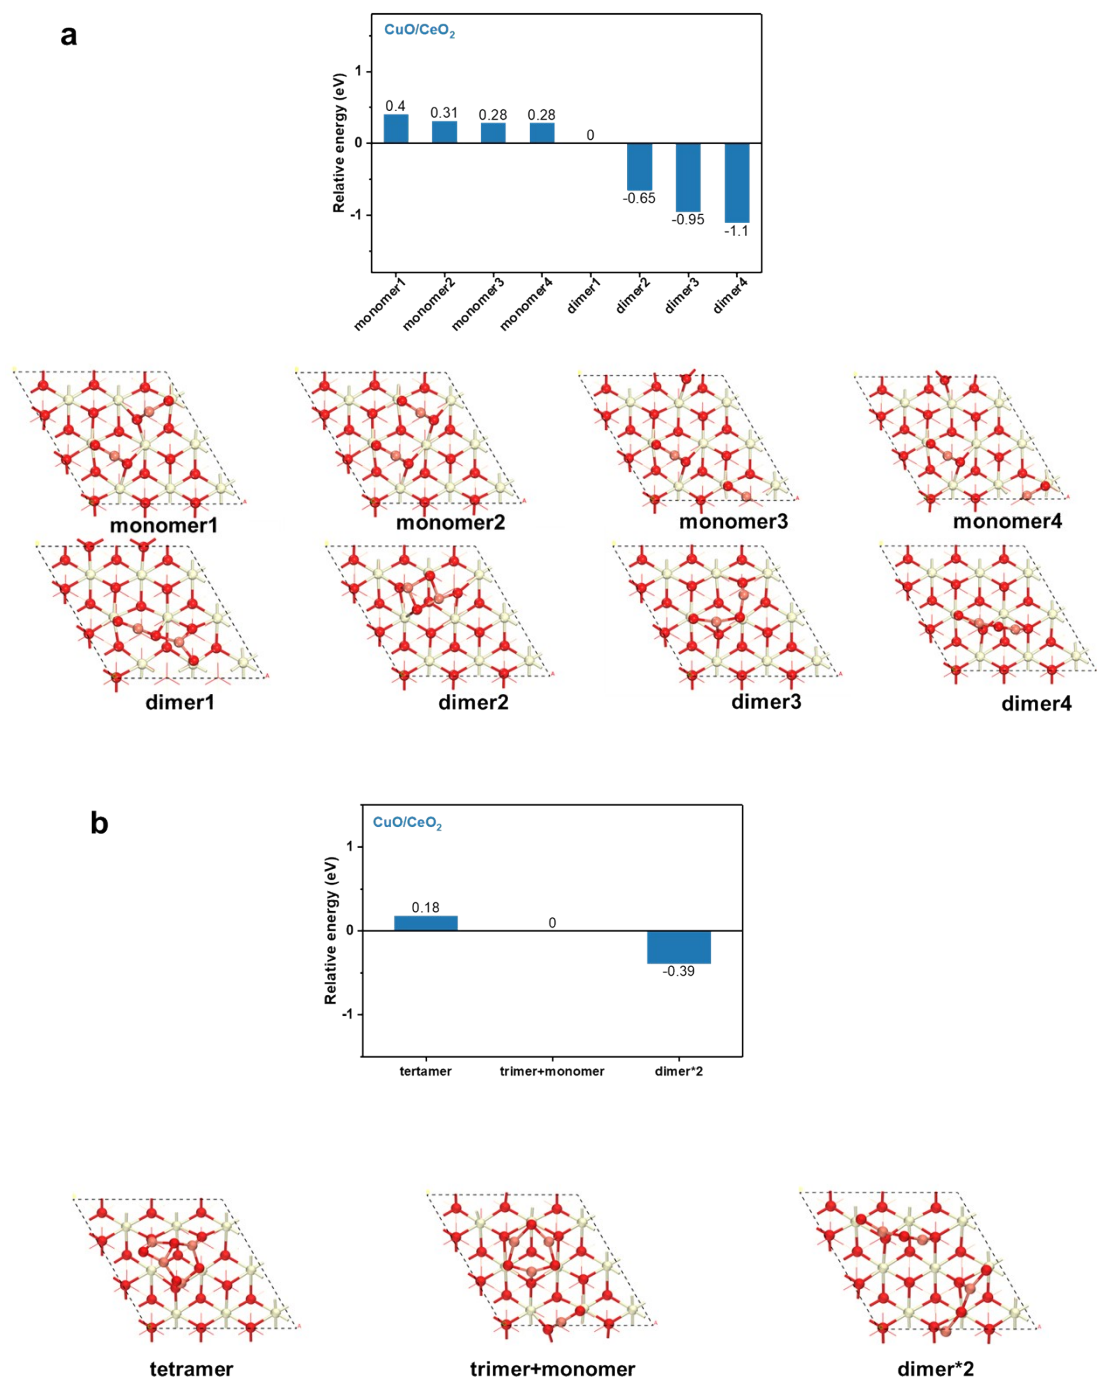

**Figure S9.** Energy comparison of different configurations of CuO/CeO<sub>2</sub> at different surface Cu density. (a) 2 CuO in each periodic cell. (b) 4 CuO in each periodic cell. Red, orange and yellow balls represent O, Cu and Ce respectively.

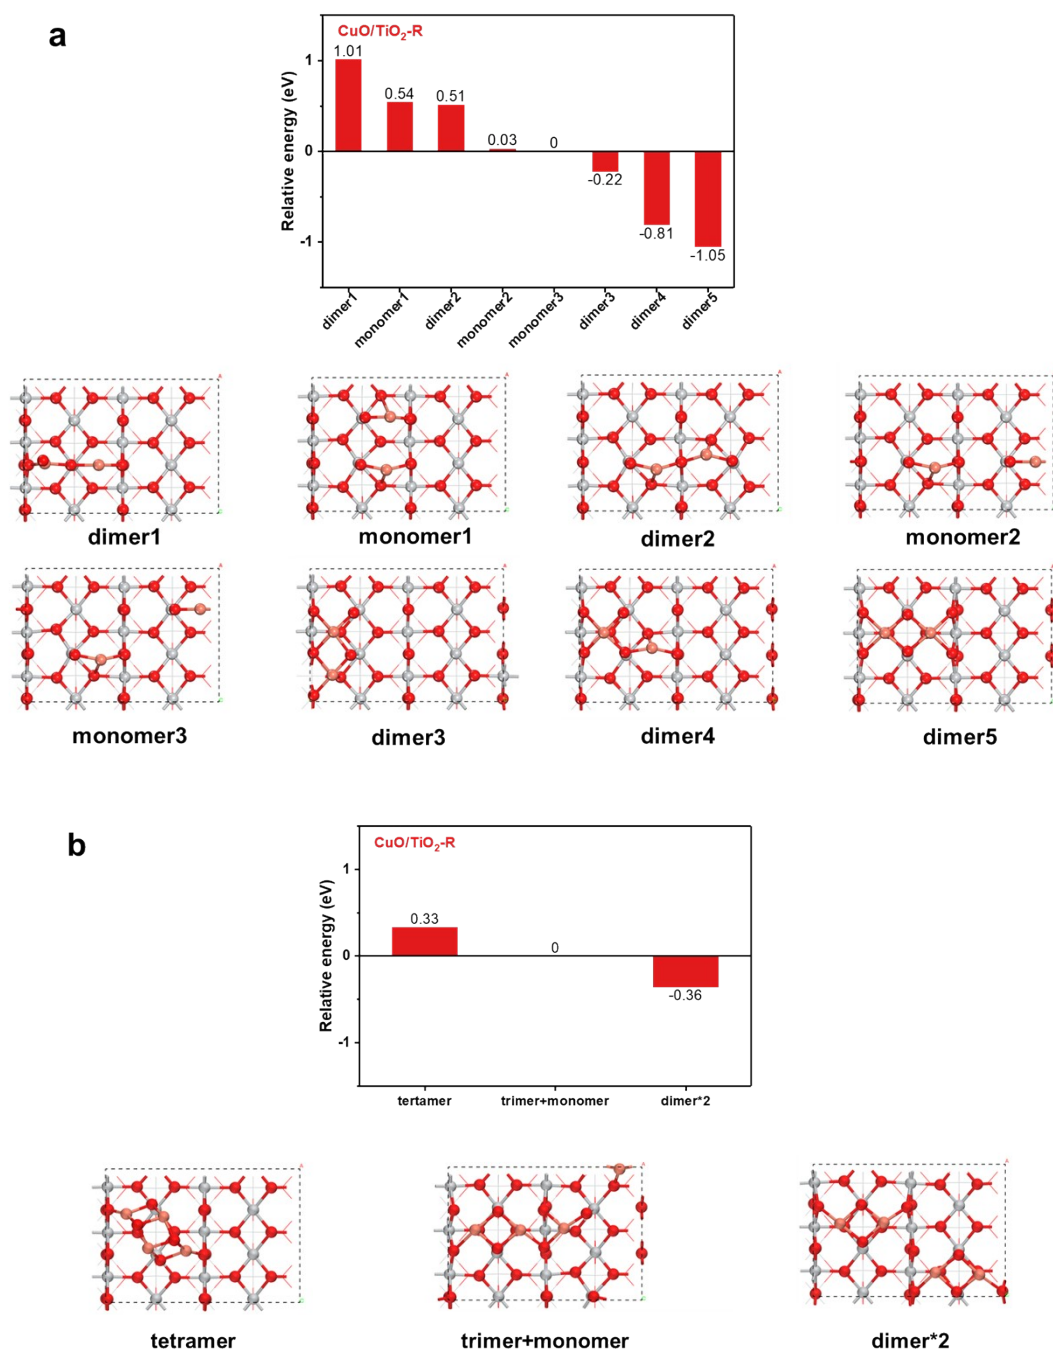

**Figure S10.** Energy comparison of different configurations of CuO/TiO<sub>2</sub>-R at different surface Cu density. (a) 2 CuO in each periodic cell. (b) 4 CuO in each periodic cell. Red, orange and gray balls represent O, Cu and Ti respectively.

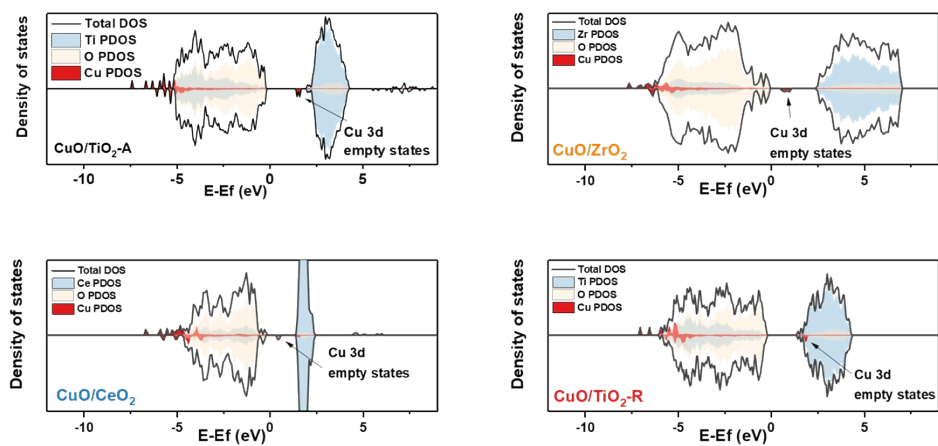

**Figure S11.** Projected density of states results of  $\text{CuO/TiO}_2\text{-A}$ ,  $\text{CuO/ZrO}_2$ ,  $\text{CuO/CeO}_2$  and  $\text{CuO/TiO}_2\text{-R}$  theoretical models.

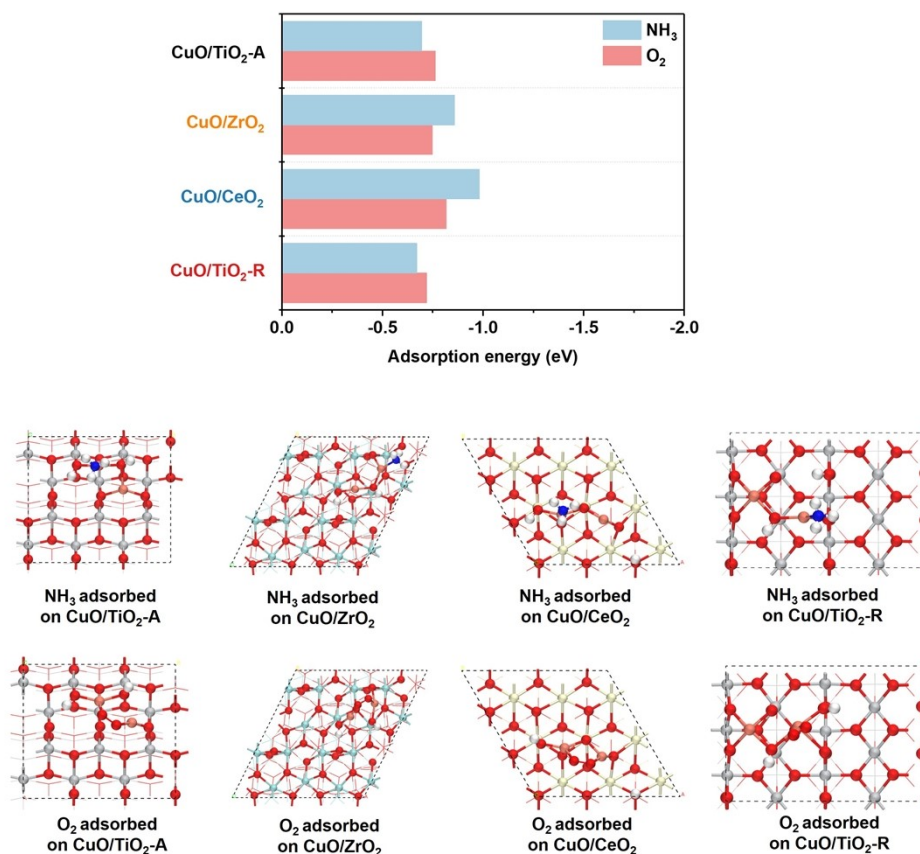

**Figure S12.** Energy of  $\text{NH}_3$  and  $\text{O}_2$  adsorption on catalysts during  $\text{NH}_3$ -SCO. Red, orange, blue, white, gray, green and yellow balls represent O, Cu, N, H, Ti, Zr and Ce respectively.

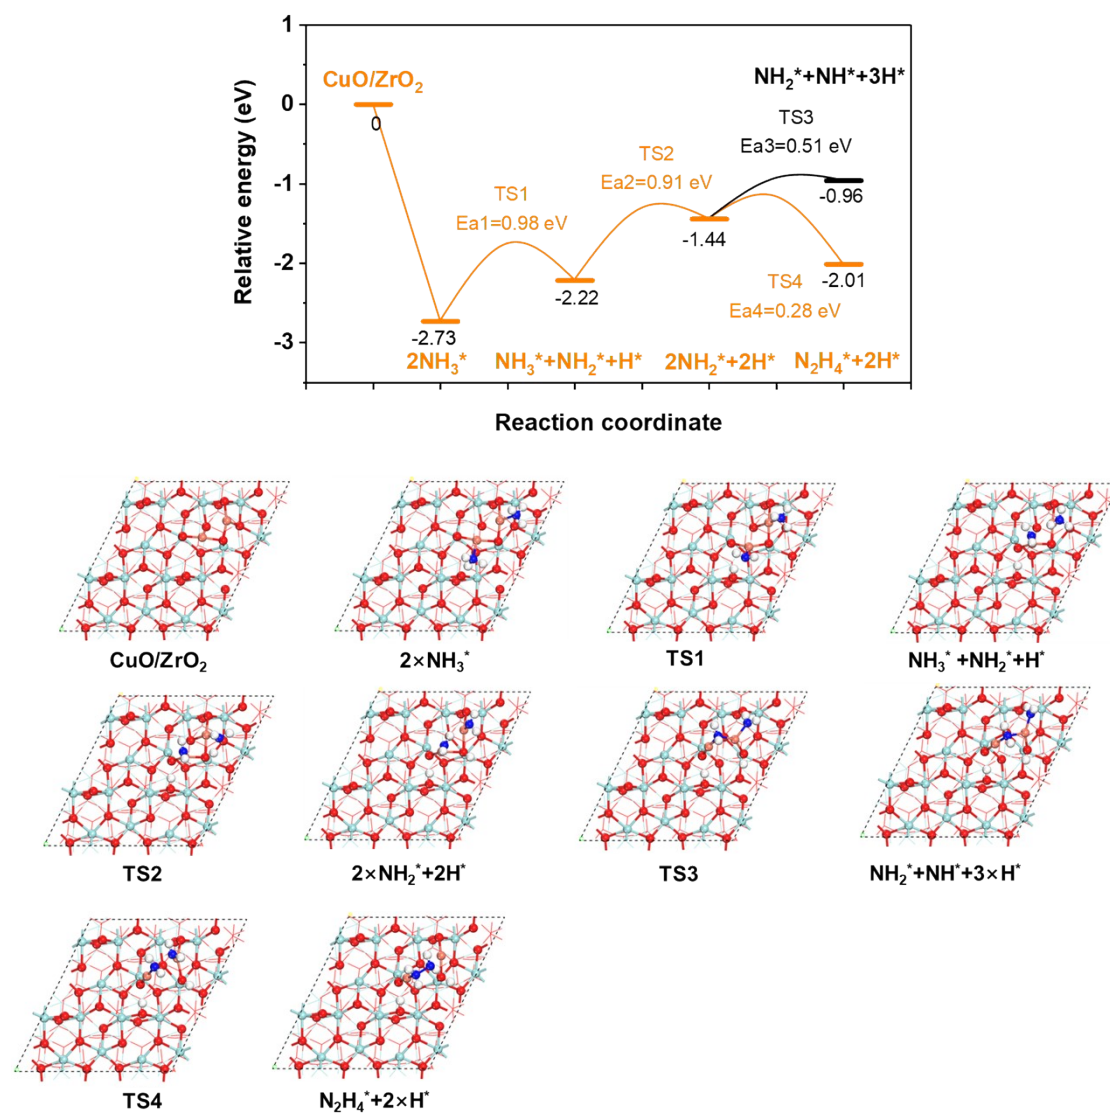

**Figure S13.** Energy diagram and optimized structures of all the intermediates and transition states for  $\text{NH}_3$  transformation to  $\text{N}_2\text{H}_4^*$  or  $\text{NH}^*$  over  $\text{CuO/ZrO}_2$  in this manuscript. Red, orange, blue, white and green balls represent O, Cu, N, H, and Zr respectively.



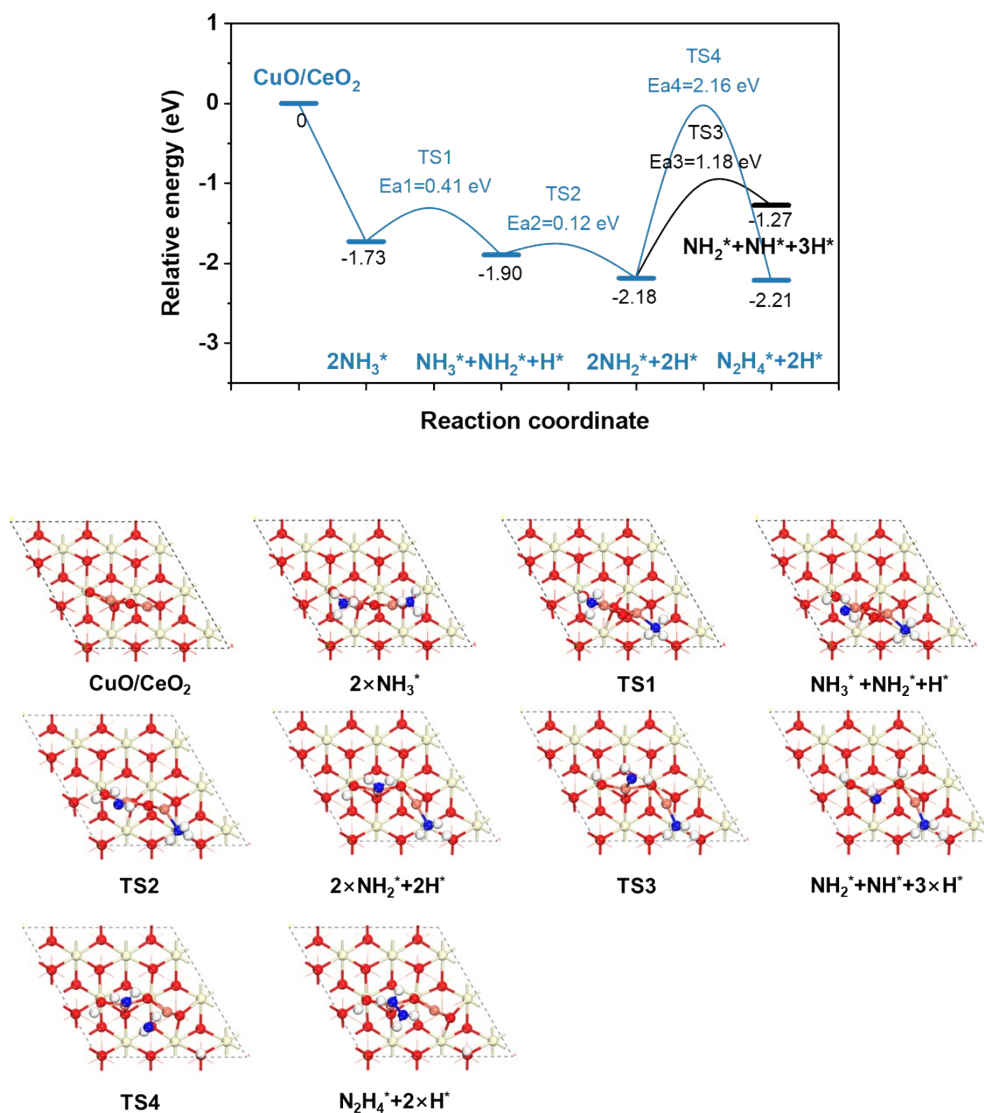

**Figure S14.** Energy diagram and optimized structures of all the intermediates and transition states for  $\text{NH}_3$  transformation to  $\text{N}_2\text{H}_4^*$  or  $\text{NH}^*$  over  $\text{CuO/CeO}_2$  in this manuscript. Red, orange, blue, white and yellow balls represent O, Cu, N, H, and Ce respectively.

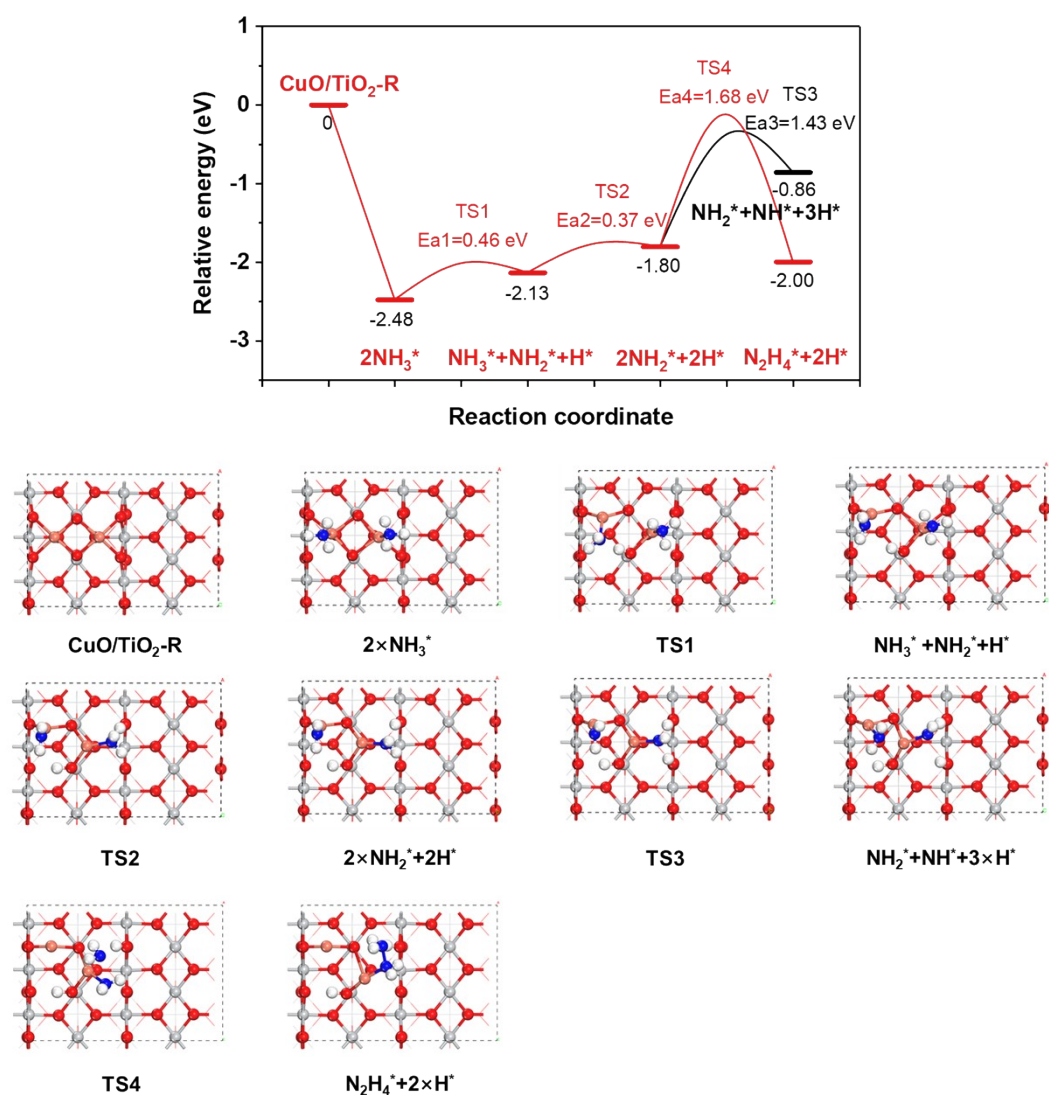

**Figure S15.** Energy diagram and optimized structures of all the intermediates and transition states for NH<sub>3</sub> transformation to N<sub>2</sub>H<sub>4</sub>\* or NH\* over CuO/TiO<sub>2</sub>-R in this manuscript. Red, orange, blue, white and gray balls represent O, Cu, N, H, and Ti respectively.



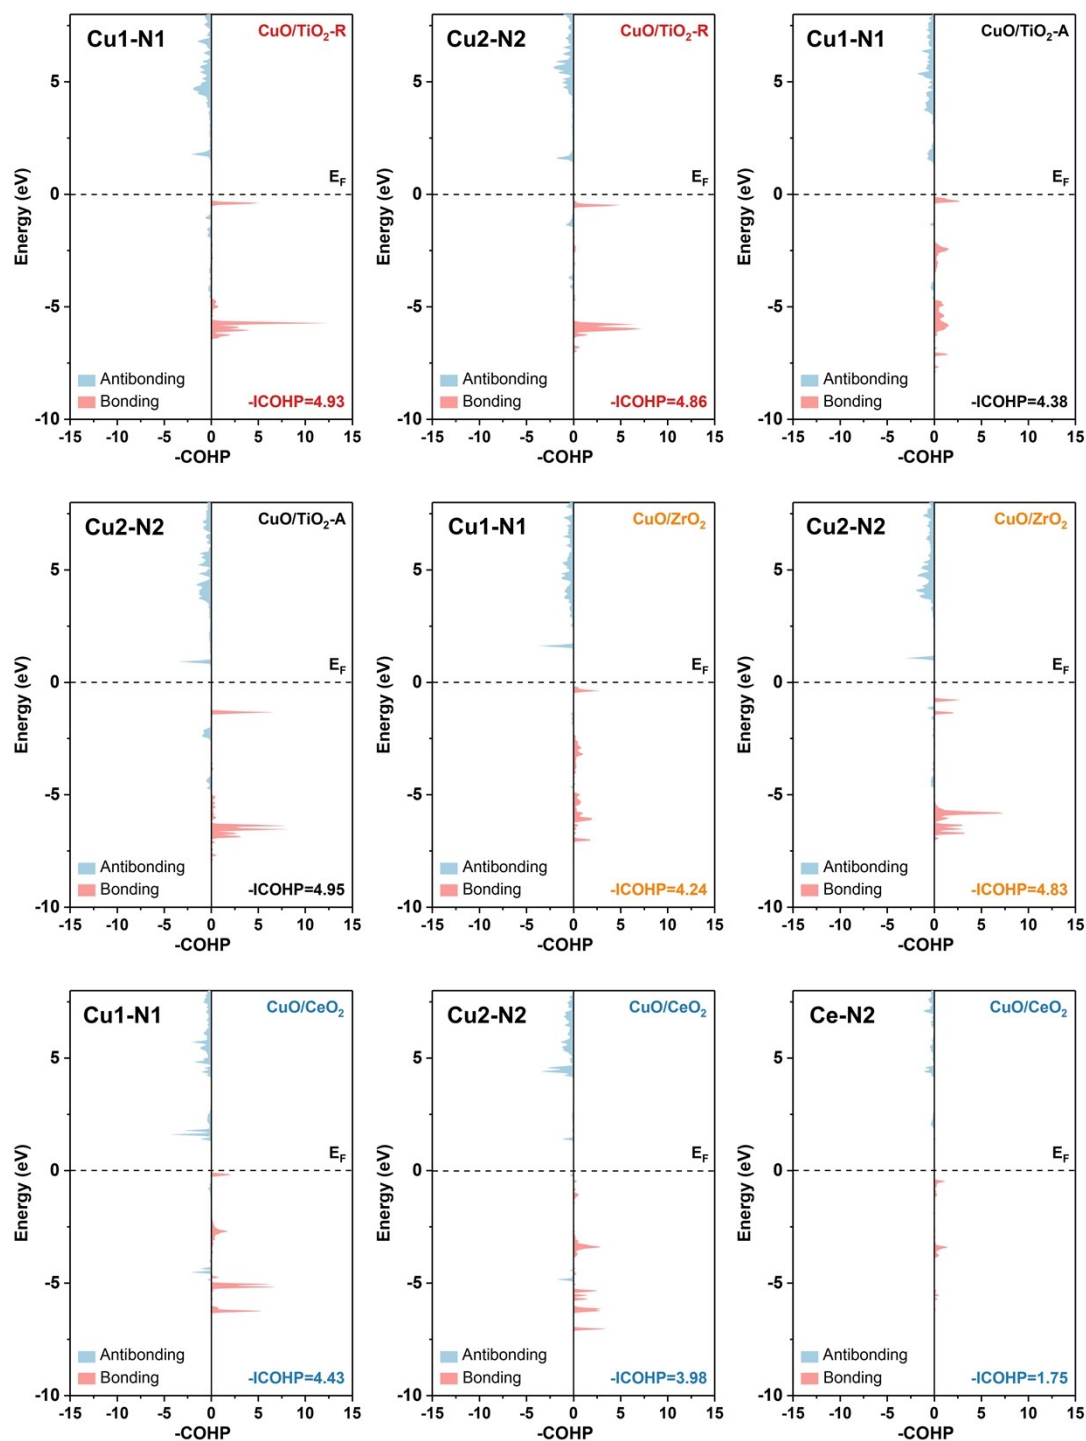

**Figure S16.** Crystal orbital Hamilton population analysis of N-Cu and N-Ce bonds in  $2\text{NH}_2^* + 2\text{H}^*$  intermediate states of different catalysts.

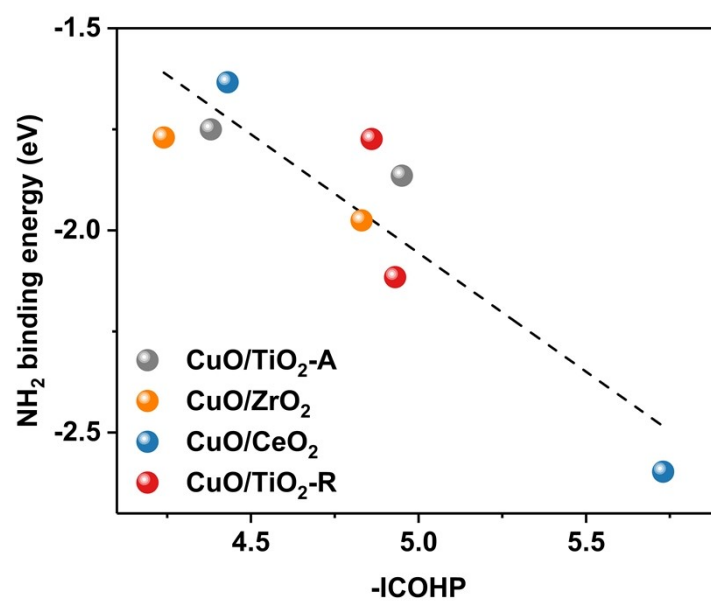

**Figure S17.** Relations between  $-ICOHP$  of catalyst-N and  $NH_2$  binding energy.

**Table S1** Cu mass ratio obtained by ICP-OES.

| Sample                  | Cu(wt%) |
|-------------------------|---------|
| CuO/TiO <sub>2</sub> -A | 0.91    |
| CuO/ZrO <sub>2</sub>    | 0.85    |
| CuO/CeO <sub>2</sub>    | 0.89    |
| CuO/TiO <sub>2</sub> -R | 0.83    |

**Table S2** BET surface area, pore diameter and pore value of the catalysts and supports evaluated by N<sub>2</sub> adsorption.

| Sample                       | BET specific surface area<br>(m <sup>2</sup> g <sup>-1</sup> ) | Pore diameter<br>(nm) | Pore volume<br>(cm <sup>3</sup> g <sup>-1</sup> ) |
|------------------------------|----------------------------------------------------------------|-----------------------|---------------------------------------------------|
| <b>CuO/TiO<sub>2</sub>-A</b> | 60                                                             | 12.22                 | 0.19                                              |
| <b>CuO/ZrO<sub>2</sub></b>   | 65                                                             | 13.96                 | 0.22                                              |
| <b>CuO/CeO<sub>2</sub></b>   | 70                                                             | 5.76                  | 0.10                                              |
| <b>CuO/TiO<sub>2</sub>-R</b> | 26                                                             | 23.18                 | 0.14                                              |
| <b>TiO<sub>2</sub>-A</b>     | 87                                                             | 9.72                  | 0.23                                              |
| <b>ZrO<sub>2</sub></b>       | 78                                                             | 12.44                 | 0.23                                              |
| <b>CeO<sub>2</sub></b>       | 70                                                             | 5.72                  | 0.10                                              |
| <b>TiO<sub>2</sub>-R</b>     | 27                                                             | 25.63                 | 0.13                                              |

**Table S3** Surface Cu density of the catalysts

| Sample                  | Surface Cu density         | Surface Cu density in    |
|-------------------------|----------------------------|--------------------------|
|                         | in experiment <sup>a</sup> | computation <sup>b</sup> |
|                         | (Cu nm <sup>2</sup> )      | (Cu nm <sup>2</sup> )    |
| CuO/TiO <sub>2</sub> -A | 1.44                       | 1.67                     |
| CuO/ZrO <sub>2</sub>    | 1.24                       | 1.22                     |
| CuO/CeO <sub>2</sub>    | 1.12                       | 1.75                     |
| CuO/TiO <sub>2</sub> -R | 3.02                       | 1.67                     |

<sup>a</sup> Obtained combining ICP-OES result and BET surface area.

<sup>b</sup> Obtained by calculating the Cu density in each periodic cell of theoretical model.

**Table S4.** Reaction energy (eV) and energy barriers (eV).

| Reaction step                                                      | CuO/TiO <sub>2</sub> -A <sup>a</sup> |      | CuO/ZrO <sub>2</sub> |      | CuO/CeO <sub>2</sub> |      | CuO/TiO <sub>2</sub> -R |      |
|--------------------------------------------------------------------|--------------------------------------|------|----------------------|------|----------------------|------|-------------------------|------|
|                                                                    | E                                    | Ea   | E                    | Ea   | E                    | Ea   | E                       | Ea   |
| R1: 2NH <sub>3</sub> (g)→2NH <sub>3</sub> *                        | -2.40                                | \    | -2.73                | \    | -1.73                | \    | -2.48                   | \    |
| R2: 2NH <sub>3</sub> *→NH <sub>3</sub> *+NH <sub>2</sub> *+H*      | -0.02                                | 0.65 | 0.51                 | 0.98 | -0.17                | 0.41 | 0.35                    | 0.46 |
| R2': NH <sub>3</sub> *+NH <sub>2</sub> *+H*→2NH <sub>2</sub> *+2H* | 1.05                                 | 1.07 | 0.78                 | 0.91 | -0.28                | 0.12 | 0.33                    | 0.37 |
| R3: 2NH <sub>2</sub> *+2H*→NH <sub>2</sub> *+NH*+3H*               | 1.75                                 | 2.66 | 0.48                 | 0.51 | 0.91                 | 1.18 | 0.94                    | 1.43 |
| R4: 2NH <sub>2</sub> *+2H*→N <sub>2</sub> H <sub>4</sub> *+2H*     | -0.61                                | 0.88 | -0.57                | 0.28 | -0.03                | 2.16 | -0.20                   | 1.68 |

<sup>a</sup> Details of energy diagram and intermediate structure of CuO/TiO<sub>2</sub>-A could be found in our previous research.<sup>1</sup>

## REFERENCES

1. M. C. Ran, Y. Dong, X. Zhang, W. X. Li, Z. Wang, S. S. Lin, Y. Yang, H. Song, W. H. Wu, S. J. Liu, Y. H. Zhu, C. H. Zheng and X. Gao, *Environ. Sci. Technol.*, 2024, **58**, 12249–12259.
